# Supplementary material for: A Phase II Randomized Clinical Trial and Mechanistic Studies Using Improved Probiotics to Prevent Oral Mucositis Induced by Concurrent Radiotherapy and Chemotherapy in Nasopharyngeal Carcinoma
Source: PubMed Central journal article supplement (PMC8024544; doi:10.3389/fimmu.2021.618150), 2021-03-24

**FIGURE S1** The prebiotic evaluation of *L. Plantarum* MH-301, *B. Animalis* subsp.*lactis* LPL-RH, *L. Rhamnosus* LGG-18 and *L. Acidophilus*.

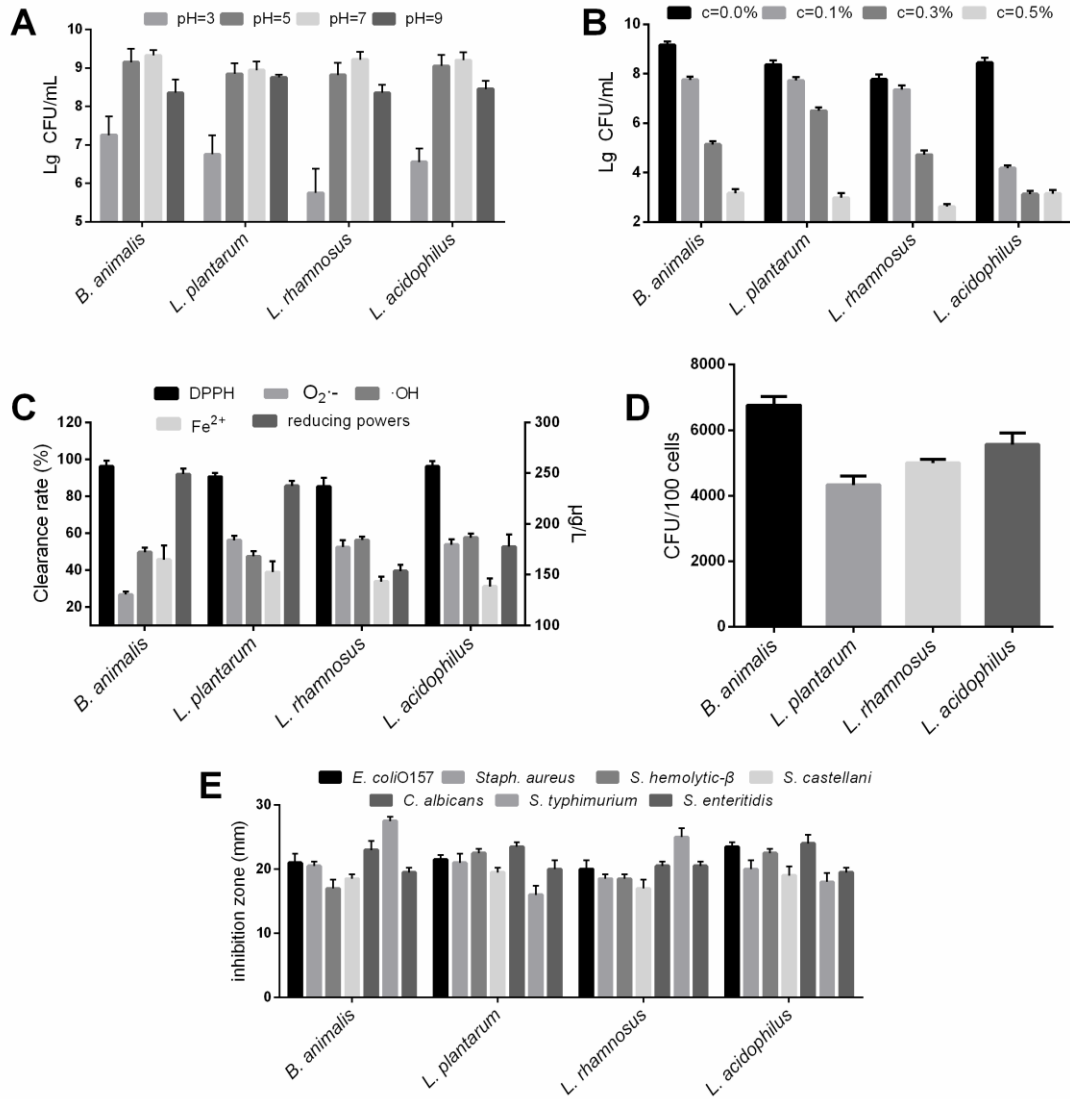

Supplement: Image_1.pdf [file Image_1.pdf]
