# Supplementary material for: A Phase II Randomized Clinical Trial and Mechanistic Studies Using Improved Probiotics to Prevent Oral Mucositis Induced by Concurrent Radiotherapy and Chemotherapy in Nasopharyngeal Carcinoma
Source: PubMed Central journal article supplement (PMC8024544; doi:10.3389/fimmu.2021.618150), 2021-03-24

**FIGURE S2 Representative pictures to relieve OM in rats with the combination of probiotics.**

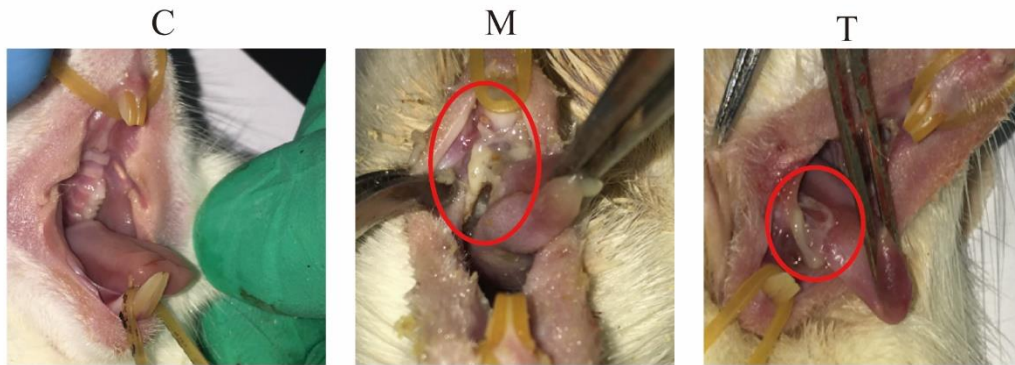

Supplement: Image_2.pdf [file Image_2.pdf]
